# Supplementary material for: Symmetric Excitons in an (001)-Based InAs/GaAs Quantum Dot Near Si Dopant for Photon-Pair Entanglement
Source: MDPI journal article supplement (doi:10.3390/cryst11101194), 2021-09-30
Supplement: s1 [file s1]

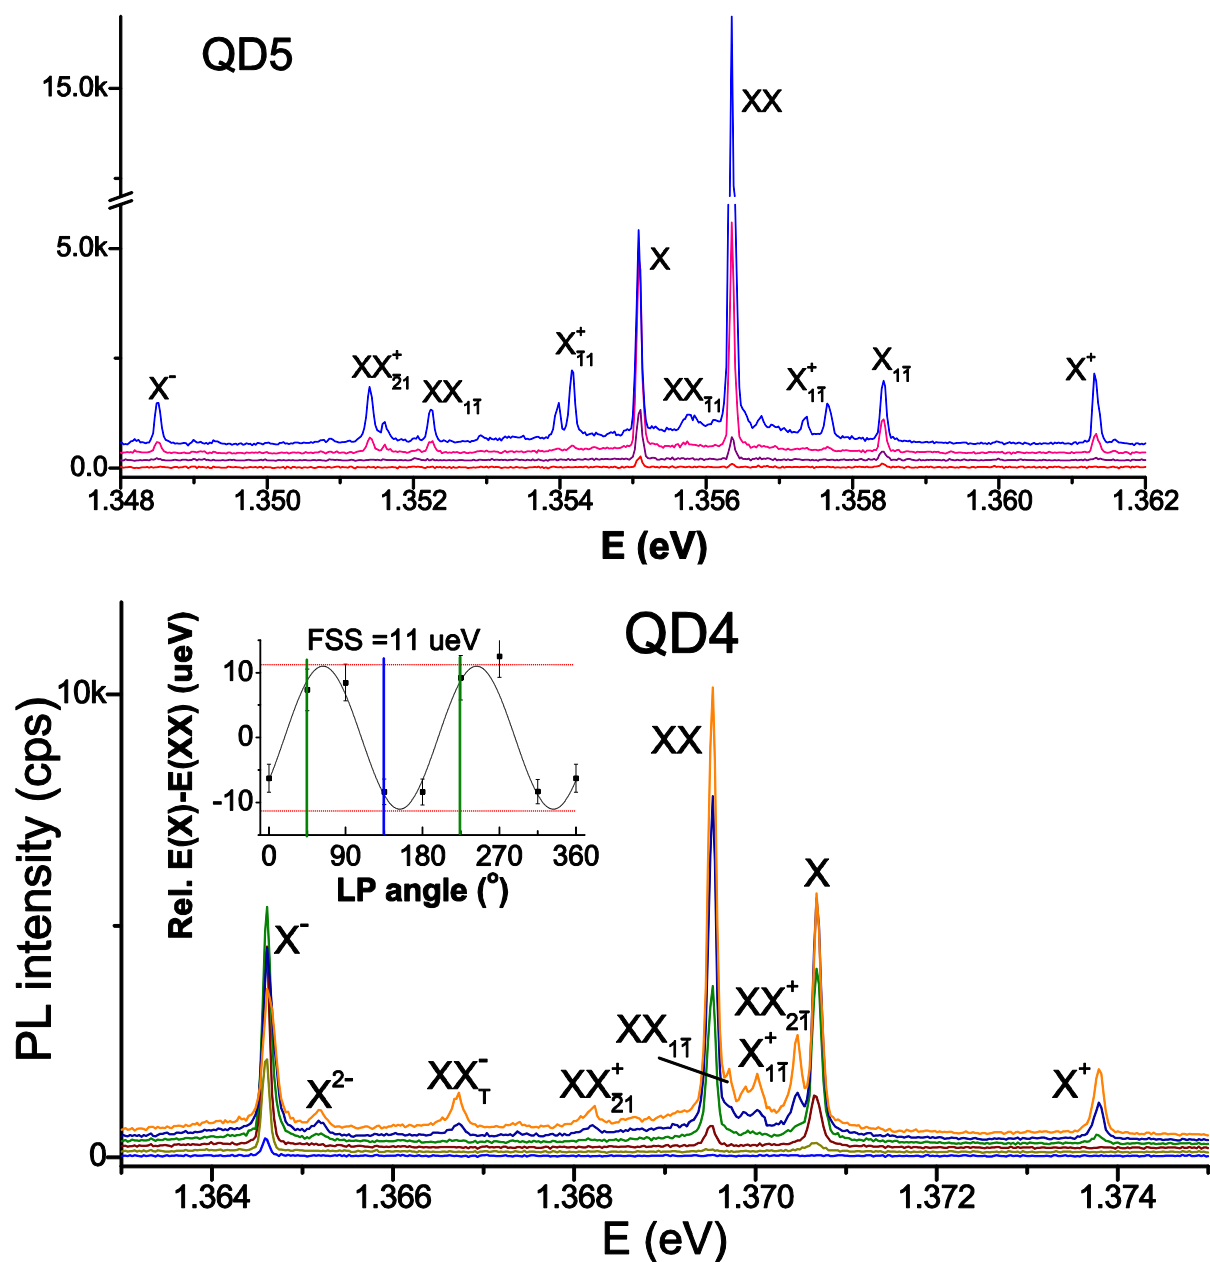

**Figure S1.** Excitation power-dependent uPL spectra in QD5 with more  $D_{3h}$  symmetric exciton emission features and QD4 with similar  $D_{3h}$  symmetric exciton emission features as QD1 and FSS  $\sim 11$  ueV.

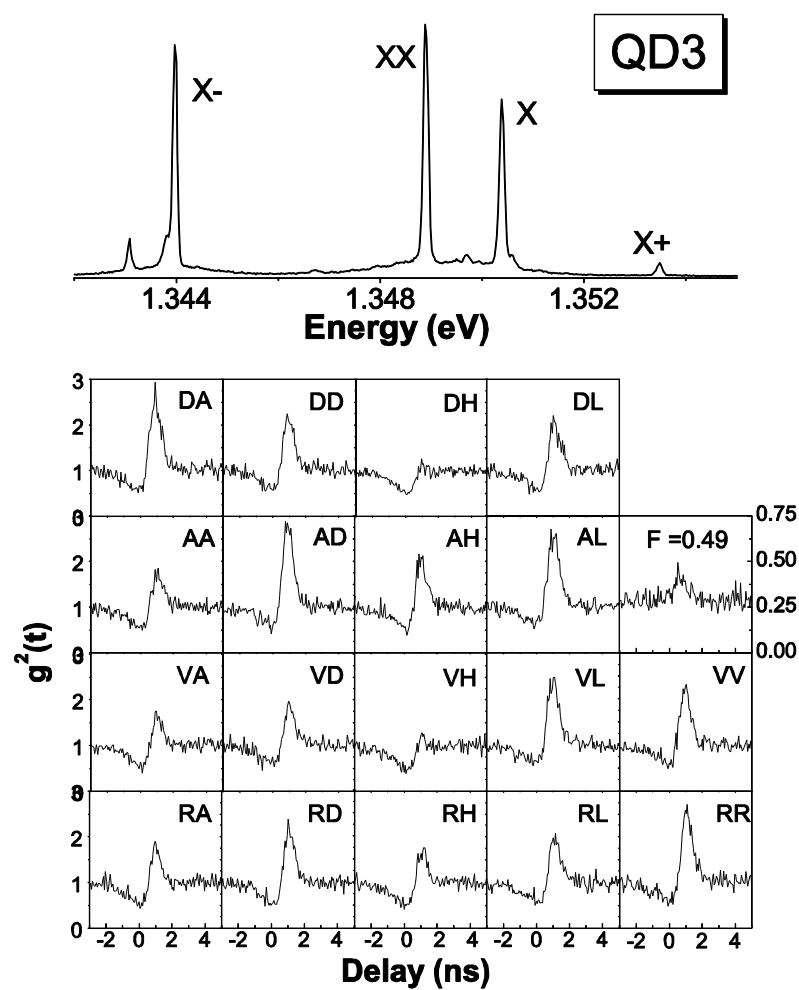

Figure S2. 18 combinations of polarization-related XX-X correlations in QD3 (FSS = 6.8 ueV,  $F = 0.49$ ).

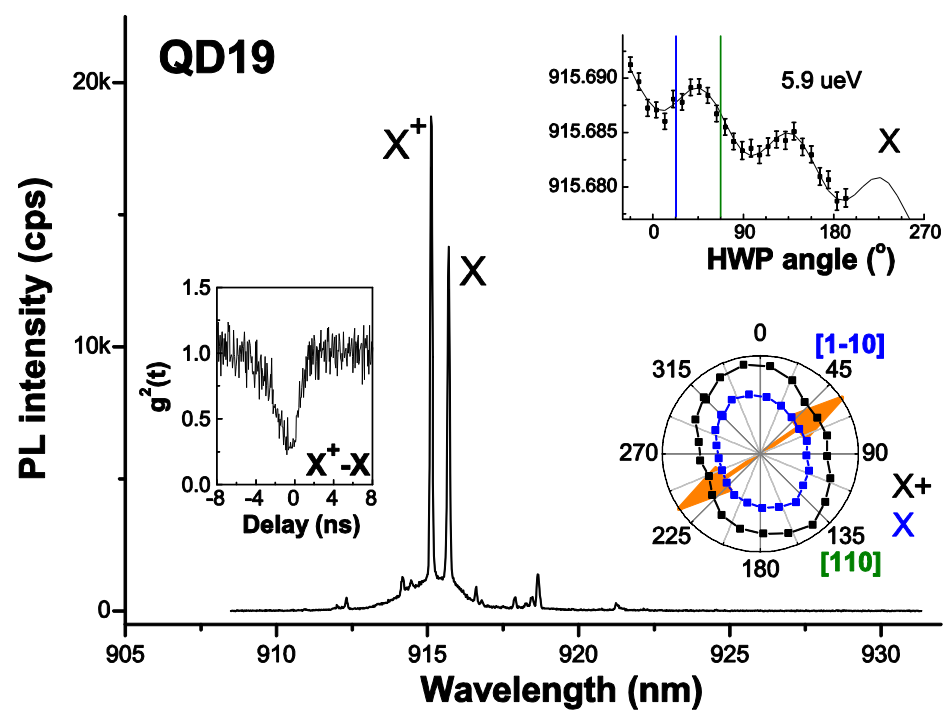

Figure S3.  $\mu$ PL spectrum, FSS oscillation and EIP in a polar plot in QD19.
