# Supplementary material for: Symmetric Excitons in an (001)-Based InAs/GaAs Quantum Dot Near Si Dopant for Photon-Pair Entanglement
Source: MDPI journal article supplement (doi:10.3390/cryst11101194), 2021-09-30
Supplement: s1 [file s1]

Archive with 1 entries (1 files):
- crystals-1345628-supplementary.pdf
